# Supplementary material
Source: Research Square preprint supplement (doi:10.21203/rs.3.rs-9439122/v1)
Supplement: Supplementary file 1 [file bb8b589857d29a371ef89abb.docx]

**Hydration and Entanglement Contrasts Between Dry and Wet States in Blood-Compatible Poly(2-methoxyethyl acrylate)**

**(Chojnowski Memorial Issue)**

Yi Zhang1, Yukiko Tanaka1, Satoshi Honda1*, Masaru Tanaka1*

1Institute for Materials Chemistry and Engineering, Kyushu University, 744 Motooka, Nishi-ku, Fukuoka 819-0385, Japan

Correspondence and requests for materials should be addressed to S.H. (email: honda.satoshi.329@m.kyushu-u.ac.jp) or M.T. (email: tanaka.masaru.763@m.kyushu-u.ac.jp)


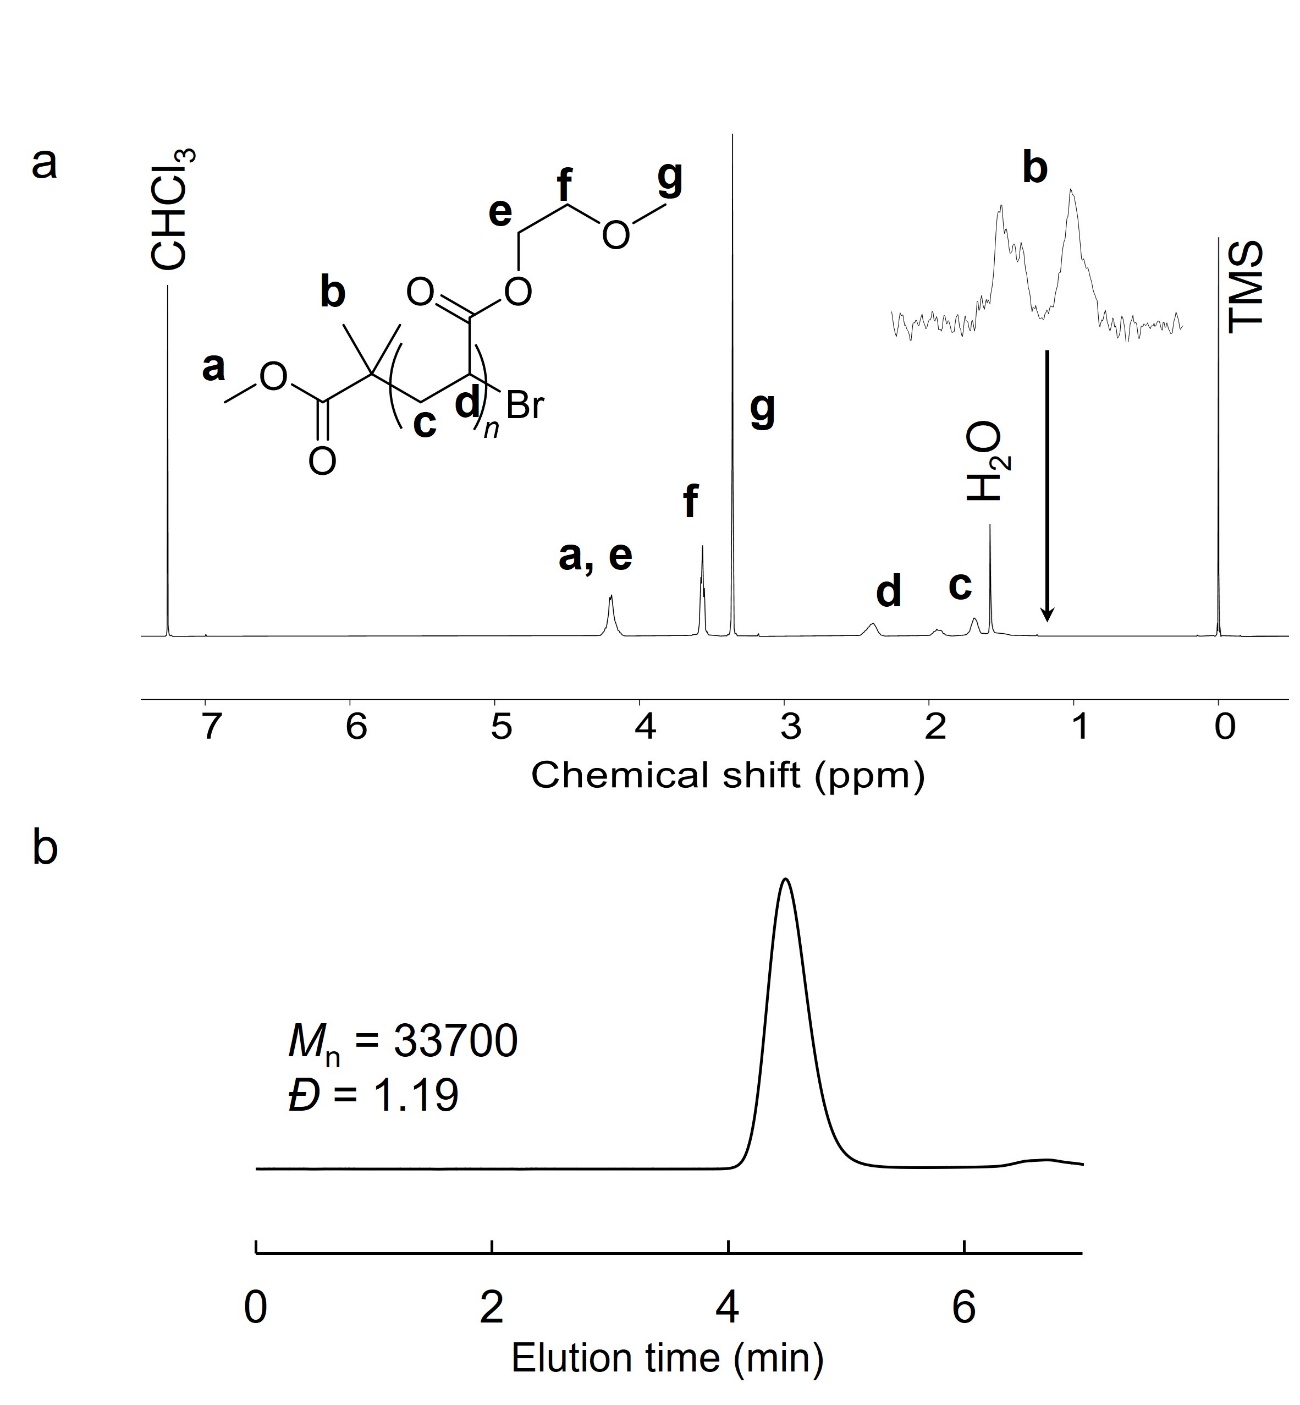


**Fig. S1** a ¹H NMR spectrum confirming successful polymerization, with disappearance of vinyl proton signals and absence of low-molecular-weight impurities. b SEC chromatogram showing a narrow and unimodal molecular weight distribution, indicating high purity of the obtained polymer.


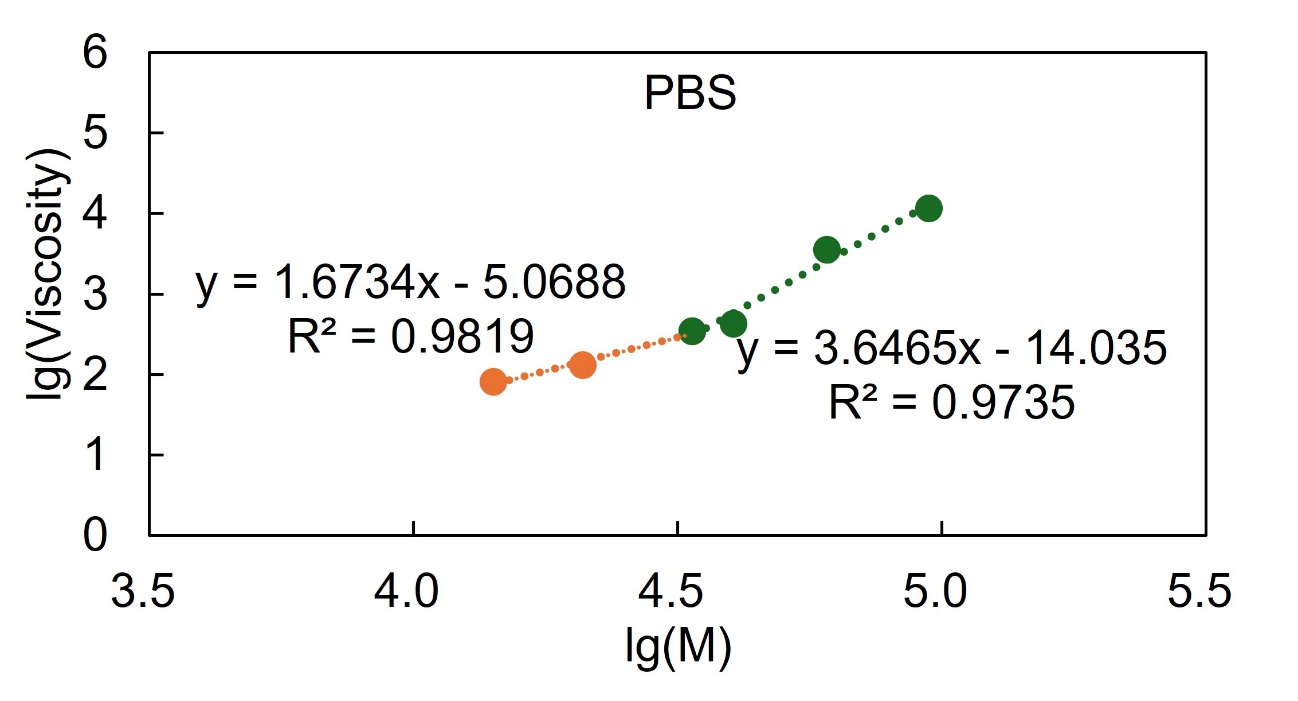
**Fig. S2** Determination of the entanglement molecular weight (Mc) of PMEA in dry and hydrated states. Hydrated in PBS (1 week). The Mc for chain entanglement is 35 kDa.


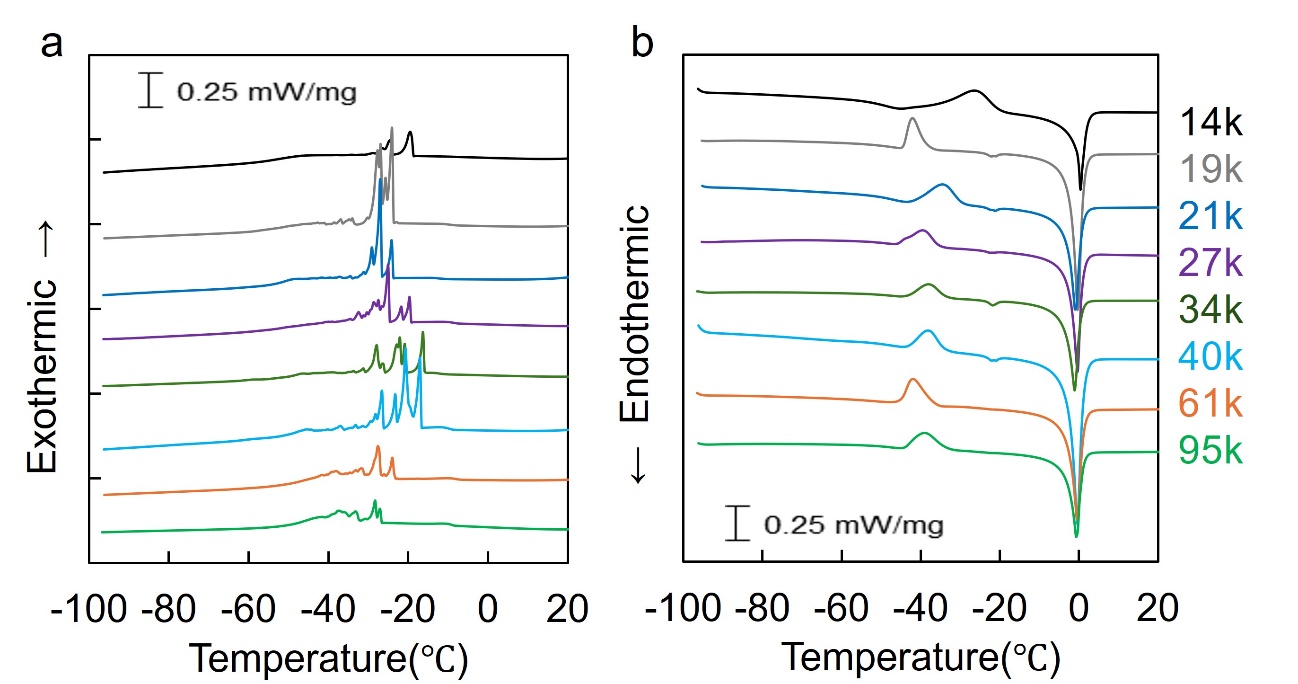


**Fig. S3** DSC thermograms (heating and cooling scans) of linear PMEA polymers hydrated in PBS to their equilibrium water content (EWC). a Cooling scans. b Heating scans.


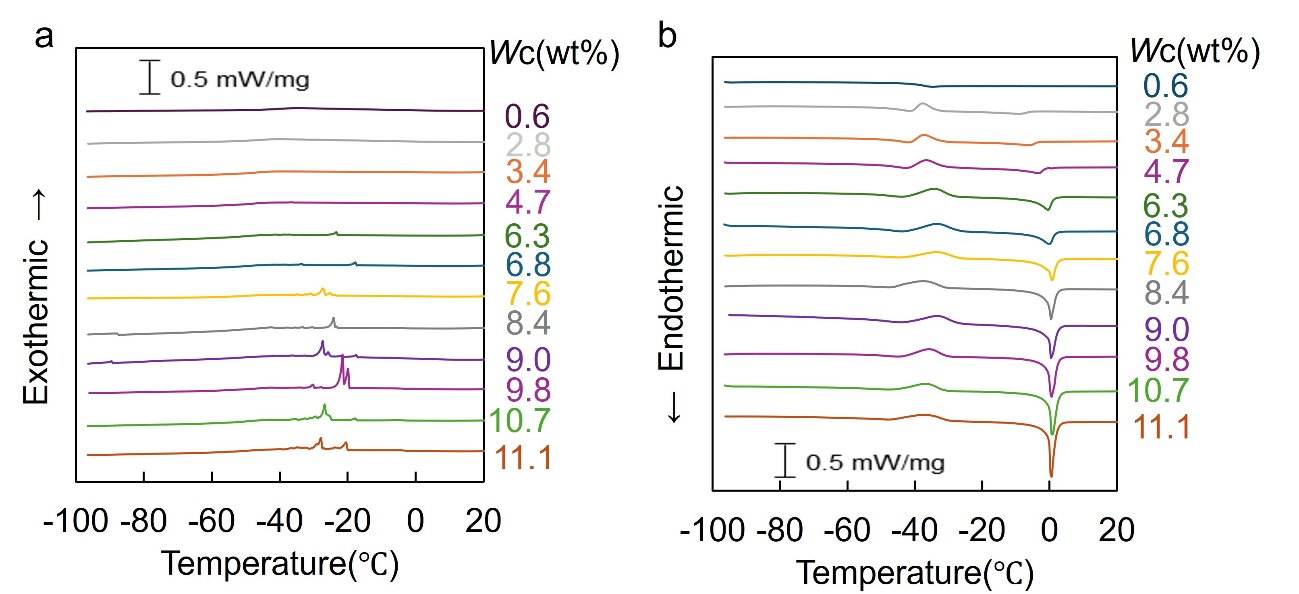


Fig. S4 DSC thermograms of PMEA -14k with different water contents, showing the contributions of different water states. a Cooling scans. b Heating scans.


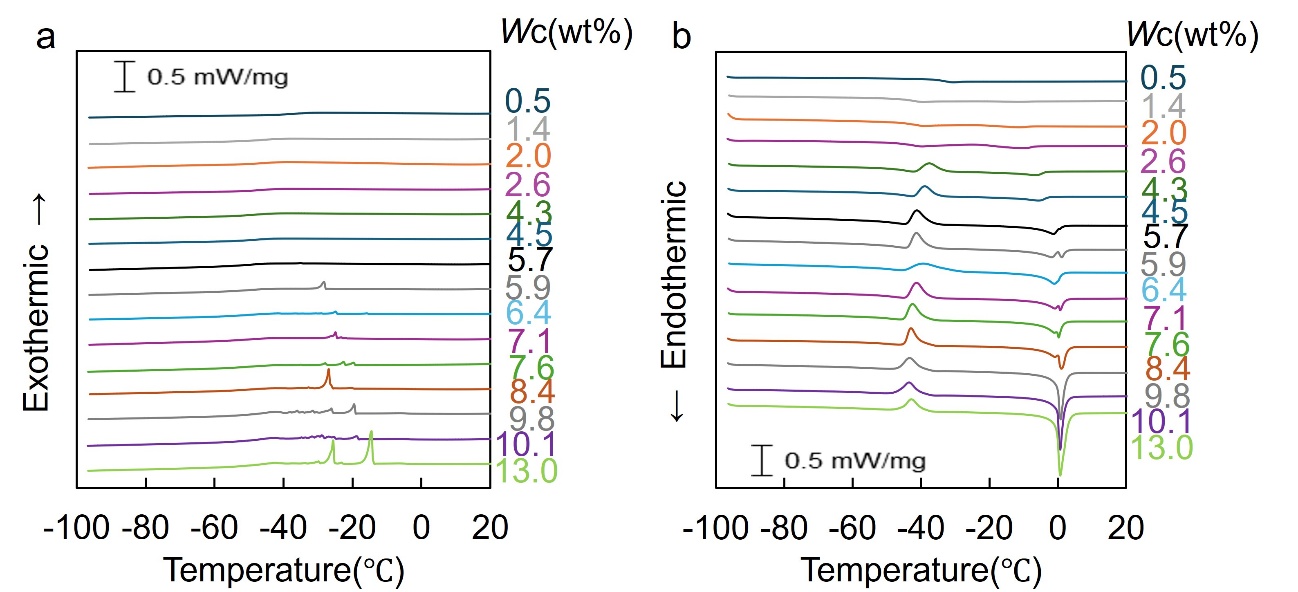


Fig. S5 DSC thermograms of PMEA -19k with different water contents, showing the contributions of different water states. a Cooling scans. b Heating scans.


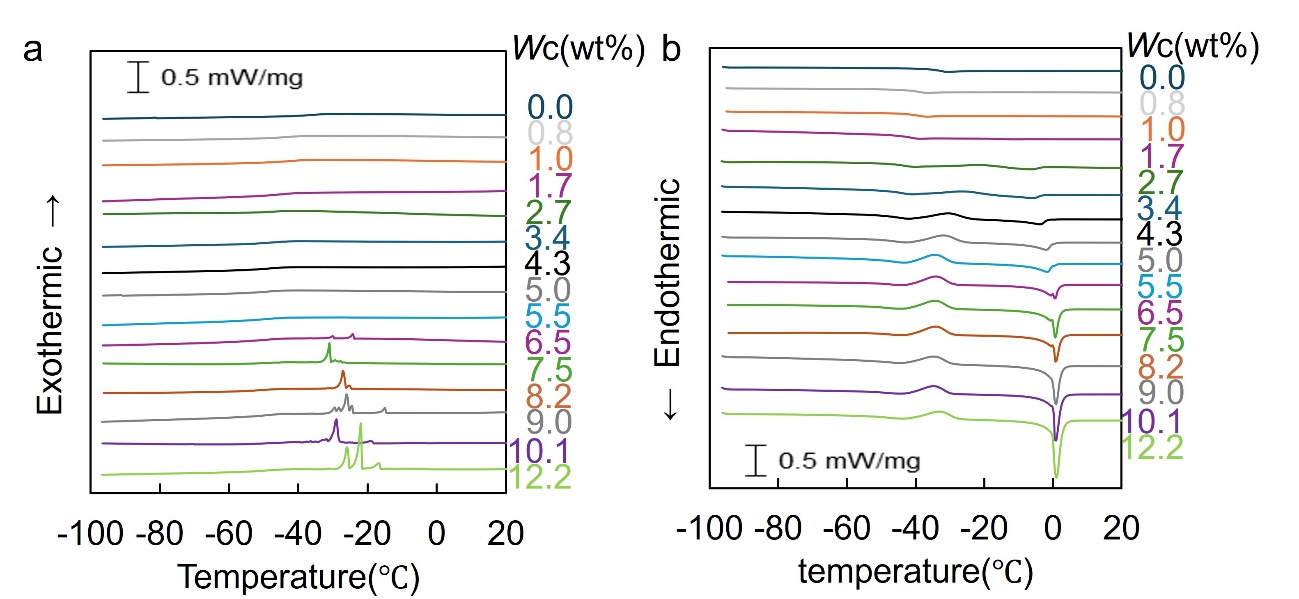


Fig. S6 DSC thermograms of PMEA -21k with different water contents, showing the contributions of different water states. a Cooling scans. b Heating scans.


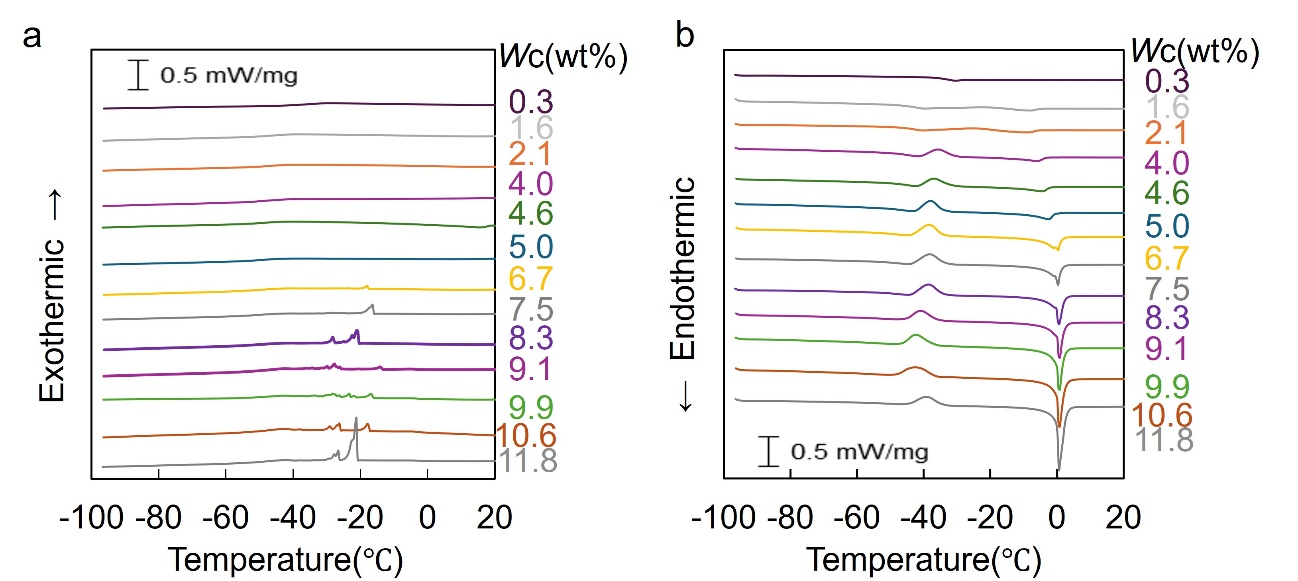


Fig. S7 DSC thermograms of PMEA -27k with different water contents, showing the contributions of different water states. a Cooling scans. b Heating scans.


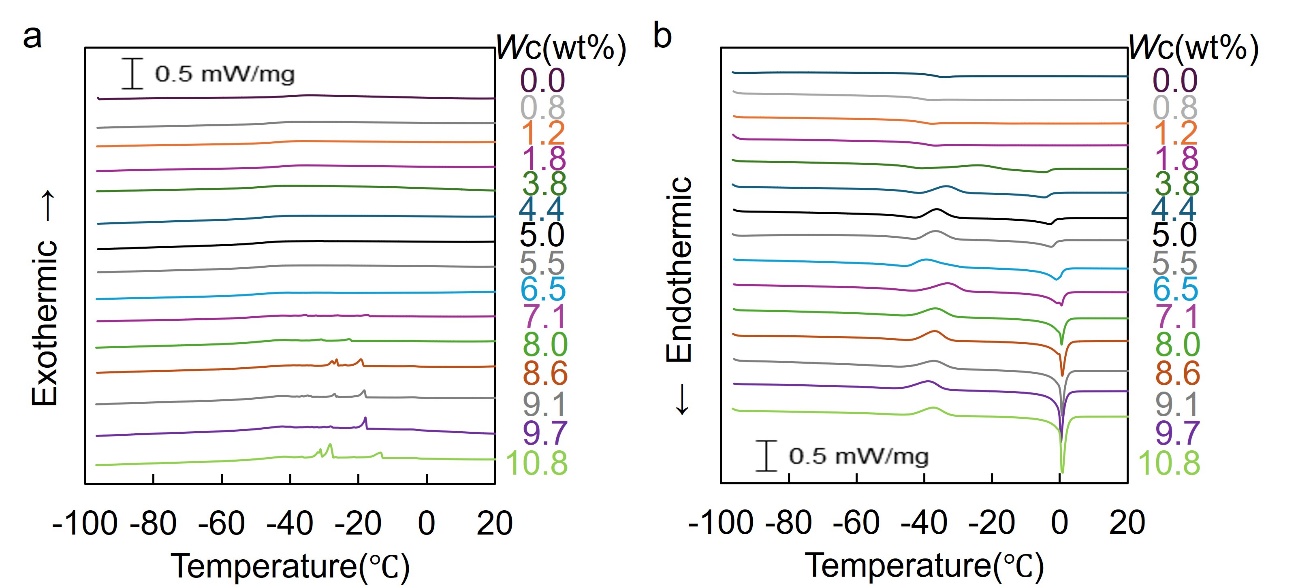


Fig. S8 DSC thermograms of PMEA -34k with different water contents, showing the contributions of different water states. A Cooling scans. B Heating scans.


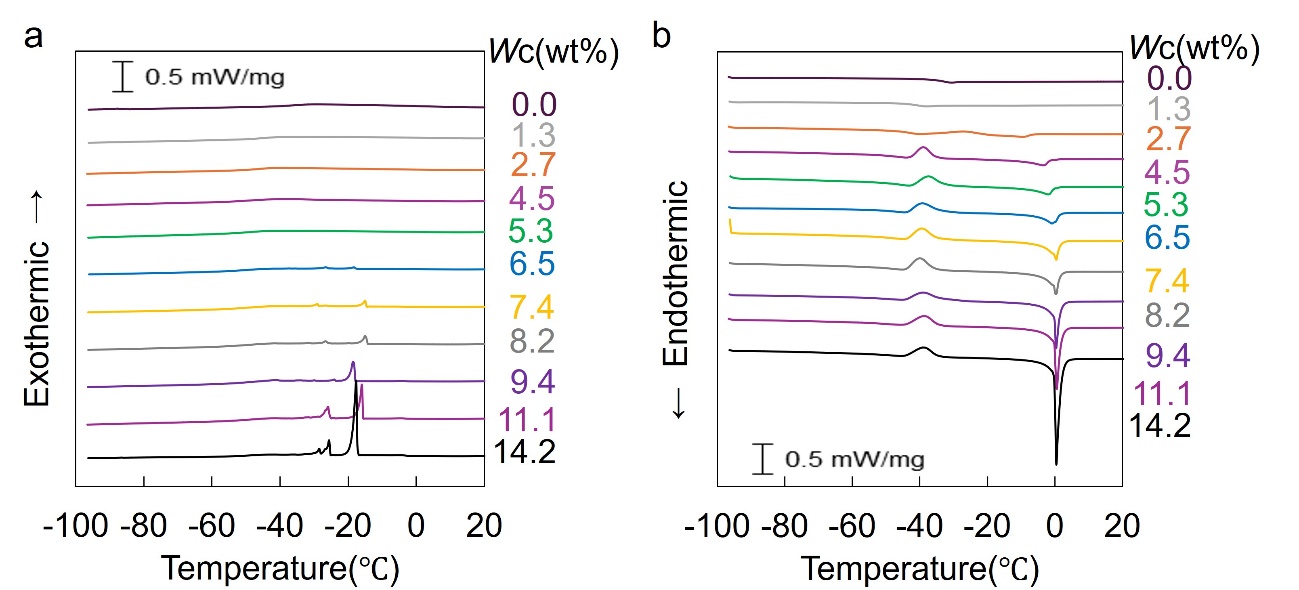


Fig. S9 DSC thermograms of PMEA -40k with different water contents, showing the contributions of different water states. a Cooling scans. b Heating scans.


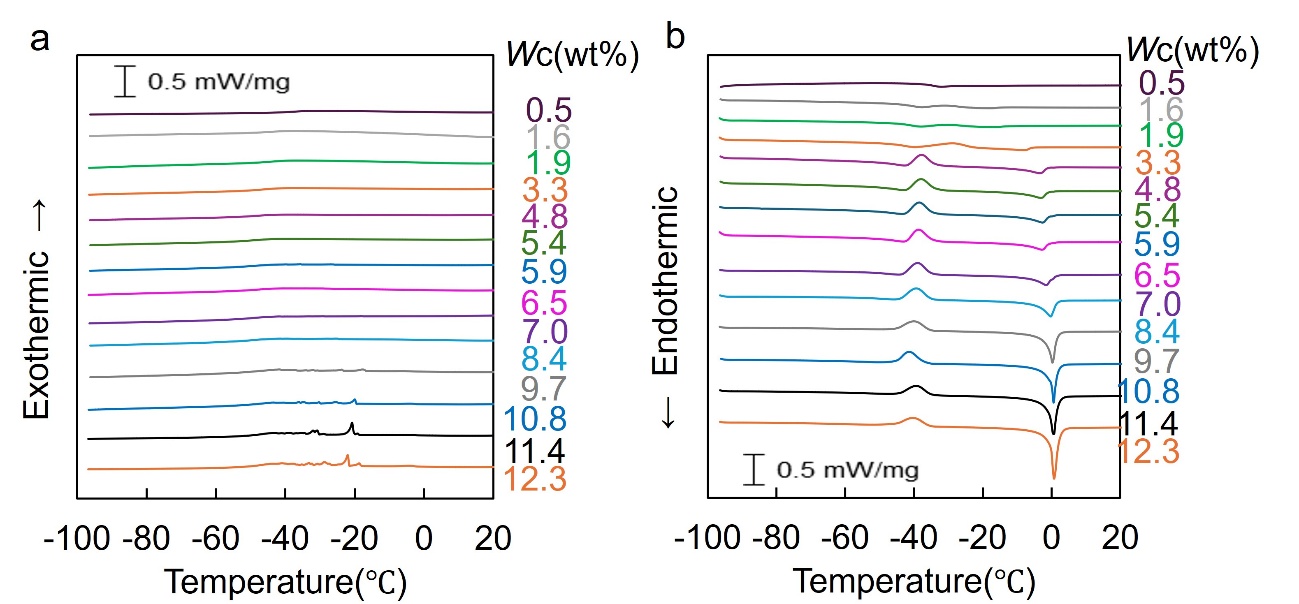


Fig. S10 DSC thermograms of PMEA -61k with different water contents, showing the contributions of different water states. A Cooling scans. B Heating scans.


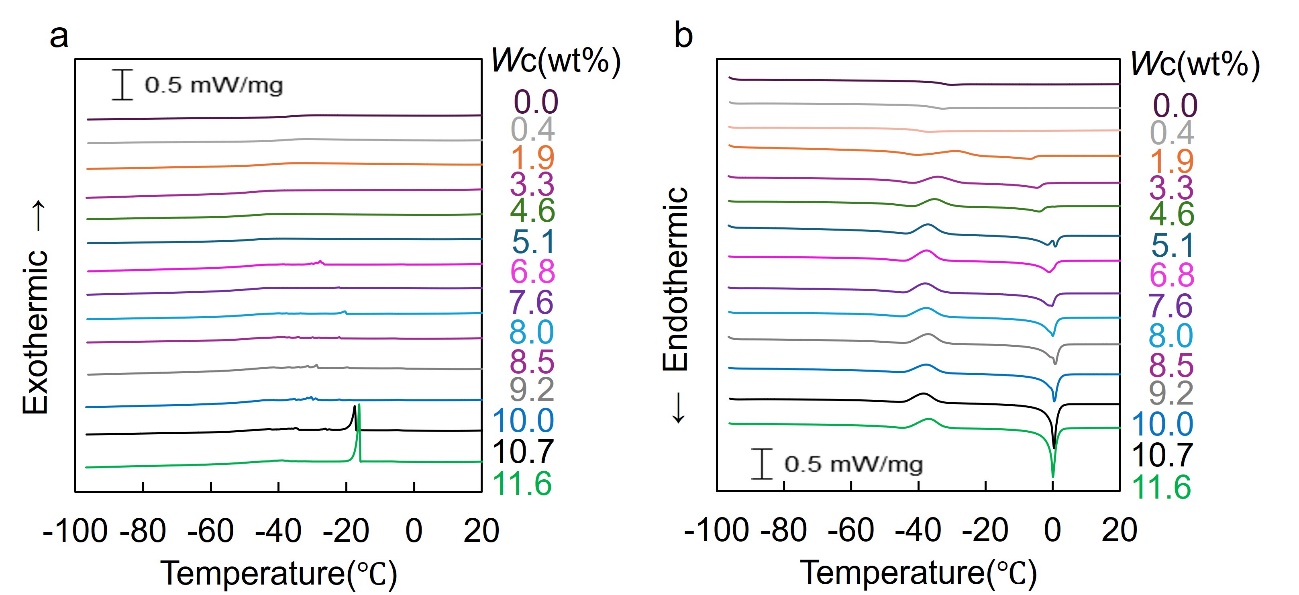


Fig. S11 DSC thermograms of PMEA -95k with different water contents, showing the contributions of different water states. A Cooling scans. B Heating scans.

**Section S1**

The amount of NFW (*R*NFW, Eq. S1) can be written as

*R*NFW = ((*M*1 − *M*0) − Δ*H*m/Δ*H*m°)/*M*0 (Eq.S1)

where, *M*0 is mass of dry sample, *M*1 is mass of hydrated sample, Δ*H*m is melting enthalpy of water based on the dry sample, and Δ*H*m° is standard melting enthalpy of water at 0 ºC and 101.3 kPa (334 J/g). The amount of IW (*R*IW, Eq. S2), and FW (*R*FW, Eq.S3) were calculated as follows:

IW: *R*IW: = (Δ*H*cc/Δ*H*m°)/*M*0 (Eq. S2)

FW: *R*FW = (Δ*H*m/Δ*H*m°)/*M*0 − *R*IW (Eq.S3)

where Δ*H*cc is cold-crystallization enthalpy of water.

Total water content:  *W*c= (*M*1 − *M*0)/*M*1 × 100: (wt%) (Eq. S4)

The equilibrium water content ：EWC = (*M*NFW + *M*IW + *M*FW)/*M*1 × 100
